# Supplementary material
Source: MDPI journal article supplement (https://www.mdpi.com/2071-1050/11/8/2361)
Supplement: s1 [file s1]

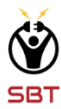

# Failure Modes and Effects Analysis (FMEA)

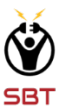

**Process/Project:** Facility Level SBT Framework Deployment **Process/Project/Product:** Hardwood Cutting Board Production - Facility Level  
**Process Owner:** Cagatay Tasdemir **Location:** FPRD Building/Wood Prod. Lab  
**FMEA Date:** August 2018

## FMEA Process

| Item/Process Step     | Potential Failure Mode        | Potential Effect(s) Of Failure                                                                                    | Severity | Potential Cause(s) Of Failure                                                                                                                   | Occurrence | Current Controls | Detection | RPN     | Recommended Action                                  | Target Completion Date |
|-----------------------|-------------------------------|-------------------------------------------------------------------------------------------------------------------|----------|-------------------------------------------------------------------------------------------------------------------------------------------------|------------|------------------|-----------|---------|-----------------------------------------------------|------------------------|
| Process 1             | Wrong Species Picked          | Defective Production, Increased Solid Waste, Emissions, Cost Factors                                              | 10.00    | Lack of organization in wood raw material storage                                                                                               | 9.00       | 0                | 9.00      | 810.00  | Conduct 5S, Develop new SOP                         | Nov-19                 |
| Process 1             | Trip and Fall Hazard          | Absenteeism, Bad Brand Image, Sanctions                                                                           | 8.00     | Workers' attitude, Improper unloading practices                                                                                                 | 1.00       | 0                | 9.00      | 72.00   | Conduct 5S, Train Workers                           | Nov-19                 |
| Process 1             | Excess Picking Time           | NVAC, NVAT                                                                                                        | 5.00     | Improper storage conditions, workers' lack of ability to identify species                                                                       | 10.00      | 0                | 5.00      | 250.00  | Conduct 5S, Train Workers, New SOP for storage area | Nov-19                 |
| Process 1,2,3,5,6,7,8 | High dB Noise Exposure        | Hearing Loss, WERAR Penalty                                                                                       | 10.00    | Workers' lack of safety awareness, Lack of SOPs, Absence of PPEs                                                                                | 3.00       | 1                | 7.00      | 210.00  | Enforce Mandatory use of Hearing Protection         | Nov-19                 |
| Process 1             | Cup&Crook in Lumber           | Defective Production, Low Yield, Excess Processing, Increased Solid Waste, Energy Consumption, Emissions and Cost | 6.00     | Non-optimal material input, Improper storage conditions, Lack of SOPs, Lack of Workers' Awareness on importance of proper stacking and storing, | 10.00      | 1                | 7.00      | 420.00  | Procure better quality lumber                       | Nov-19                 |
| Process 2             | Cup&Crook in Lumber           | Product Dimension Problems, Excess Machine Time, Increased Emissions                                              | 7.00     | Non-optimal material input, Improper storage conditions, Lack of SOPs                                                                           | 10.00      | 1                | 7.00      | 490.00  | Optimize material release specs                     | Nov-19                 |
| Process 2             | Faulty Dimensions             | Defective Production, NVAC, NVAT, Increased Transportation Emissions/batch                                        | 6.00     | Dull Knives, Too Fast Material Feeding, Sound Knots                                                                                             | 8.00       | 1                | 7.00      | 336.00  | Implement TPM, Procure higher quality lumber        | Nov-19                 |
| Process 4             | Faulty Sticks Layout          | Defective Production, Low Profit, NVAC, NVAT, Solid Waste                                                         | 10.00    | Ambient Color, Wood ID Skills, Rushed Production, Lack of SOPs, Incautious Worker                                                               | 9.00       | 1                | 8.00      | 720.00  | Train Workers                                       | Nov-19                 |
| Process 4             | Too Much Glue Usage and Waste | NVAC, Drastic Environmental Impact, Lower RTY                                                                     | 6.00     | Uncontrolled application method, incautious operator, lack of SOPs                                                                              | 10.00      | 0                | 10.00     | 600.00  | Research for Innovation                             | Nov-19                 |
| Process 4             | Too Slow Glue Drying          | NVAT, Creates a bottleneck, Too Much Lead Time, WIP                                                               | 10.00    | Technology limitation                                                                                                                           | 10.00      | 0                | 10.00     | 1000.00 | Research for Innovation                             | Nov-19                 |
| Process 5             | Dust Exposure                 | Absenteeism, Aspiratory System Problems, WERAR Penalty, Unhappy Employee                                          | 10.00    | Lack of SOPs, Lack of Supervision, Lack of PPEs, Lack of Workers' Safety Awareness                                                              | 6.00       | 0                | 9.00      | 540.00  | Enforce Mandatory Use of PPEs                       | Nov-19                 |

|                            |                                              |                                                                                                     |       |                                                                                                                                                |       |   |       |          |                                                             |        |
|----------------------------|----------------------------------------------|-----------------------------------------------------------------------------------------------------|-------|------------------------------------------------------------------------------------------------------------------------------------------------|-------|---|-------|----------|-------------------------------------------------------------|--------|
| Process 6                  | NO VAT and VAC                               | Lean Wastes, Unnecessary Cost, Electricity usage and emissions                                      | 4.00  | Change aversion, Inefficient Use of CNC                                                                                                        | 10.00 | 0 | 10.00 | 400.00   | Inspect CNC operations and brainstorm engineering solutions | Nov-19 |
| Process 7                  | Part Alignment Issues                        | Defective Production, Excess Energy Consumption and Emissions, Low Profitability, NVAT, Solid Waste | 10.00 | Incautious Worker, Lack of proper alignment guides, insufficient suction, too much vulnerability to                                            | 10.00 | 1 | 9.00  | 900.00   | Develop New Alignment Guide                                 | Nov-19 |
| Process 7                  | Inefficient Use of CNC - One Piece at A Time | Too Much Machine Time, Too Much Energy Consumption Creates a Totally NVA Process                    | 10.00 | Suction Problems, Lack of Motivation to Innovate Solutions                                                                                     | 10.00 | 1 | 7.00  | 700.00   | Innovate to Maximize Suction                                | Nov-19 |
| Process 7                  | Faulty Edging                                | Defective Production, NVAC, NVAT, Waste, Emissions                                                  | 8.00  | Bit RPM, Faulty Part Placement, Dull Knives                                                                                                    | 8.00  | 0 | 7.00  | 448.00   | Change Bits, Reduce Speeds                                  | Nov-19 |
| Process 8                  | Faulty Engraving                             | Defective Production, Solid Waste, NVAC,                                                            | 10.00 | Workers' Lack of Familiarity with the Process                                                                                                  | 10.00 | 0 | 9.00  | 900.00   | Train Workers                                               | Nov-19 |
| Process 8                  | Too Much Cycle, Setup and Machine Time       | Increased Labor and Energy Cost, CO2 Emissions                                                      | 10.00 | Engraving Speed, Lack of Error-Proof Alignment Guide, Too Much Machine Vibration                                                               | 10.00 | 0 | 10.00 | 1000.00  | Develop New Alignment Guide                                 | Nov-19 |
| Process 8                  | Too Much Setup Time                          | NVAC, NVAT, Low Profitability                                                                       | 10.00 | Lack of Worker's Familiarity, Required Level of Precision during Part Placement in the Machine, Lack of Proper Error-Proof Guide, Lack of SOPs | 10.00 | 2 | 7.00  | 700.00   | Minimize (if not Eliminate) vulnerability to human error    | Nov-19 |
| Process 9                  | Excess Hand Sanding                          | Increased Labor Cost                                                                                | 5.00  | Too Fast Processing on CNC                                                                                                                     | 5.00  | 3 | 5.00  | 125.00   | Reduce Bit Speed and Check Again                            | Nov-19 |
| Process 9                  | Excess Mineral Oil Usage and Waste           | Adverse Environmental Impact, NVAC, Lower RTY                                                       | 4.00  | Uncontrolled application method, incautious operator, lack of SOPs                                                                             | 6.00  | 0 | 9.00  | 216.00   | Brainstorm for Innovation                                   | Nov-19 |
| Process 10                 | Plastic Packaging Material is against the    | Adverse Environmental Impact, Bad Brand Image, Unnecessary Material                                 | 7.00  | Lack of motivation to switch to alternatives, Cheap Product                                                                                    | 10.00 | 0 | 10.00 | 700.00   | Explore alternatives                                        | Nov-19 |
| Process 1-10               | High Defect Rate                             | Low Profit, Too Much Waste, Emission, Energy Consumption,                                           | 10.00 | Lack of Poka-Yoke, Lack of Cross-Training, Varying Skills of Workers, Incautious Workers, Lack of SOPs                                         | 10.00 | 1 | 9.00  | 900.00   | Implement Poka-Yoke                                         | Nov-19 |
| Process 1-10               | Low RTY                                      | Excess Material Cost, Excess Transportation CO2 Emission/batch, NVAT, Excess Processing             | 10.00 | Non-optimal lumber dimensions, defective lumber, uncontrolled usage of wood glue and mineral oil                                               | 10.00 | 1 | 9.00  | 900.00   | Ensure optimal material specs                               | Nov-19 |
| Process 3, 4, 5,6,7,8      | WIP                                          | Excess Labor and Energy Cost per batch, Increased CO2 due to energy consumption                     | 7.00  | Non-Optimal lumber width                                                                                                                       | 5.00  | 0 | 8.00  | 280.00   | eliminate bottlenecks (Process 4,7 and 8)                   | Nov-19 |
| Total Risk Priority Number |                                              |                                                                                                     |       |                                                                                                                                                |       |   |       | 13617.00 |                                                             |        |
