# Supplementary material
Source: MDPI journal article supplement (https://www.mdpi.com/2071-1050/11/8/2361)
Supplement: s1 [file s1]

Archive with 3 entries (3 files):
- SBT-5Whys.xlsx
- SBT-Fishbone.pdf
- SBT-FMEA.pdf
