# Supplementary material
Source: MDPI journal article supplement (https://www.mdpi.com/2071-1050/11/8/2361)
Supplement: s1 [file s1 › SBT-5Whys.xlsx]

## Sheet: SBT5Whys
5 WHYs for Sustainability Weaknesses of Cutting Board Manufacturing Process
Issue	Value Added Time Ratio is only 8.88%	WHY
A1-1	Process 4, 8 and 1 have extremely high non-value added time.	WHY
A2-1	Moreover, NVAT for all steps are Defect Rate adjusted. It has direct influence on NVAT calculations.	WHY
A2-2	Process 8 has the longest setup time.
A2-3	Process 4 involves 24h glue curing period which is fixed.
A2-4	Process 1 involves too lengthy of a picking time (approx. 10 minutes)
A3-1	Defect Rate got out of control in the absence of Poka-Yoke	WHY
A3-2	In Process 8, alignment of boards takes significant time since defect free production is directly correlated with accurate alignment.
A3-3	PVA is a water based glue which only cures through removal of water. Manufacturer of the glue recommends 24 h wait period before machining for problem-free outcomes.
A3-4	In Process 8, alignment is being done by hand and there is no pre-set guides.
A4-1	Wood raw material storage area quite clustered and unorganized. This area lacks the necessary Standard Operating Principles (SOPs).	WHY
A4-2	Lack of understanding on importance of Poka-Yoke
A4-3	Unloading were made by employees who lacked understanding of proper sorting, stacking and storing.
A4-4	Management thought innovation for glue curing time would never pay back.
A4-5	Absence of error-proof alignment guides limits the flexibility with production speed.
A5-1	Organization of wood raw material storage space has never been among managements’ and production teams’ priorities.	WHY
A5-2	No ongoing quality inititatives in place. Basic end-of-line inspection is the preferred quality control method.
A5-3
Issue	Value Added Cost Ratio is only around 46% OR NVAT is around 54%	WHY
A1-1	Process 1,2 and 8 has too much value added cost. Also, Process 6 has no VAT or VAC.	WHY
A2-1	Defect Rate of 26.81% has direct influence on NVAC.	WHY
A2-2	Process 1 has too much NVA labor time.
A2-3	Process 1 has too much NVA Material Cost.
A2-4	Process 2 has too much NVA Material Cost.
A2-5	Process 8 has too much NVA labor time.
A2-6	Process 6 itself is totally NVA.
A3-1	No effective quality control practices in place.	WHY
A3-2	Too length material picking activities.
A3-3	Too much wood material being wasted in Process 1 and 2, 6.38 and 2.30 kg, respectively.
A3-4	Too lengthy setup for engraving operations (approx 9.50 minutes).
A3-5	Step is only required by following process.
A4-1	Management did not measure the defect rate before.	WHY
A4-2	Wood Raw Material storage area is too clustered and workers are not very good at Wood ID.
A4-3	Dimensions of the lumber were not appropriate for the purposes, Cup&Crook Defects has to be cleared by these processes.
A4-4	Engraving operations require high precision at placement of the boards for problem-free products.
A4-5	Parts are being processed one at a time on CNC.
A5-1	Product Family is not among primary concerns of the facility	WHY
A5-2	There is no Standard Operating Procedures (SOPs) that will keep this place organized. Materials are all over the place at the moment
A5-3	There is no optimized specs for material release to the production line. Impact of Cup&Crook in production is undiscovered.
A5-4	Although precision is key in engraving step, there is no proper guides to help workers with board placement into the machine.
A5-5	Current setup for CNC production won't generate enough suction for processing of multiple parts at once.
Issue	Poor Net Profit Margin Perfomance (Approx. 33% Loss) Evethough Facility Does Not Pay Taxes for These Operations	WHY
A1-1	Excessive Labor and Material Cost, $109.20 and $29.02, respectively. High Defect Rate (26.81%). Poor RTY (19.34). WIP	WHY
A2-1	Too Much Cost Incurring Cycle Time in Processes 1,2,7,8.	WHY
A2-2	Non-Effective Quality Control pactices creates re-occuring defects in Process 7,8,2 and 4.
A2-3	Non-optimal material input(quality + dimensions) has direct influence on Poor RTY and WIP.
A3-1	Too Much Picking Time in Process1, Excessive Wood Processing in Process 2 due to Cup&Crook Defects, Lengthy Machine Time in Process 7 and 8, approx. 11 and 88 minutes, respectively.	WHY
A3-2	CNC, Laser Engraver, Faulty Part Dimensions, Lumber Defects and Faulty Species Layout are responsible for >95% of total defects
A3-3	Material is being waste to clear defects or due to excess thickness (>1 inch). Uncontrolled dimensions also creating WIP.
A4-1	Lack of Wood ID Skills and Improper Storage Conditions. Lack of controlled material release into the system. Inefficient use of CNC and Low Engraving Speed	WHY
A4-2	CNC loses suction, Engraver has vibration issues, planer may cut too deep occasionally, Loose Knots and other wood anatomy caused issues lead to faulty end items, workers lack required Wood ID Skills, Ambient Color is not appropriate for species identification.
A4-3	Material is being picked randomly from common storage are. No designated storage area + No SOPs for material picking and release.
A5-1	Employee Turnover occurs almost annualy. Wood ID skills only get better over time. Conditions of storage area is in critical condition--> From trip&fall hazards to improper stacking and shelving practices. Material fed into the system is not picked according to contingency of the final product, yield maximization principles and minimal processing considerations. On piece processing is against exi…	WHY
A5-2	Current alignment guide for CNC does not take advantage of all the suction power available, unsecure board alignment guide misaligns as Engraver head moves and strikes to perform the engraving job. Lumber with loose knots or bug marks is let into the system, which is against the problem-free final product description. Light color may not be appropriate for species identification, many of workers …
A5-3	Product Family was a late add-on to the product mix. Therefore, no designated storage area was spared. Lack of SOPs for material procurement, picking and release contribute to undesired levels of material and labor cost
Issue	Net Green Area Impact is 100%	WHY
A1-1	No sustainability concerns were present when the facility was built (1910).	WHY
A1-2	No Mandatory regulations in place in this category
A1-3	The management never engaged with Sustainability assessments before
A1-4	Cost of green area impact neutralization was deemed unnecessary by the management
A2-1	Resource scarcity, environmental concerns, deforestation and other sustainability topics gained popularity after 1980s	WHY
A2-2	Policy development takes time
A2-3	The management started to be interested in Sustainability initiatives only recently.
A2-4	Revenue generated by operations were used to support educational activities. Therefore, they did not want to create extra cost factors.
A3-1	Global Trends and Innovation Waves changes based on realized awareness of the society	WHY
A3-2	Arrival of an engineer with a personal interest in Sustainability triggered the deployment of SBT Framework
A4-1	Mother Nature starte to struggle to deal with increased population and ever-expanding and evolving needs of humankind	WHY
A4-2	Pressing sustainability concern triggered development of new research areas and professional interests
A5-2	Cost minimization was the key and the management never considered green area impact neutralization. Only recently sustainability has become part of the management's agenda	WHY
Issue	Net CO2 Emission Impact (27.34 kg Co2 eq - 9.86 kg CO2 eq) 64%	WHY
A1-1	High Transportation Emissions/batch	WHY
A1-2	Emissions due to Solid Waste Generated in Processes 1,2 and 7
A1-3	Emissions due to high energy consumption in Processes 7 and 8.
A2-1	Mpg of preferred transportation mode	WHY
A2-2	Wood waste due to defective lumber and uncontrolled dimensions
A2-3	High machine time leads to increased energy consumption which has indirect impact on CO2 emissions
A3-1	Old vehicles are being used. Material hauled is heavy and requires powerful engines. Material usage efficiency has also part in it.	WHY
A3-2	Wood waste occur whencup&crook present in lumber and thickness and length of the material input is uncontrolled
A3-3	Too Many machines (5) involved in Process 7 yet, being used inefficiently. Process 8 can't be expedited because boards won’t stay in place.
A4-1	New vehicle investment is infeasible and also it is not the only influential factor. Impact calculated through variables of weight, distance, vehicle size. Low RTY increases emissions per batch	WHY
A4-2	Material input specs are non-optimal that causes release of unacceptable or inappropriate raw materials into the system
A4-3	CNC loses suction which force the employee to process one piece at a time
A5-1	Vehicle is being used at full capacity. New vehicle investment won’t make much difference unless it is a electric powered vehicle, which is an infeasible investment for the this facility considering the size of operations. Low RTY plays bigger role in Transportation CO2/batch. Non-Optimal Material input specs is also correlated with Low RTY.	WHY
A5-2	Current board alignment system lacks features to take advantage of suction power avaialble. Current board securing in Process 8 was not reliable and ends up with defective production. Therefore, flexibility to increase the speed is taken away.
Issue	Net Energy Footprint (30.19 kWh) Impact = 100%	WHY
A1-1	Excess consumption in Process 7,2 and 8	WHY
A1-2	No Renewable Energy Input or Avoidance Initiatives
A1-3	High Defect rate inflates the energy consumption
A2-1	Excess processing on planer and jointer.	WHY
A2-2	No infrastructure available and new investment in this regard was considered to be infeasible for the facility. Energy consumption was never seperately measured for this product family and methods to avoidance techniques were unknown.
A2-3	Defect detection is poor and the system is full of failure modes.
A3-1	Cupped&Crooked Lumber requires special attention. Too thick or wide material also add onto processing time.	WHY
A3-2	Facility was built in 1910. Renewable energy infrastructure are considered to be unaffordable at the moment. The product was added to the product mix only recently. Energy consumption avoidance techniques (allocation methods) gained popularity recenty.
A3-3	Root-causes of defects were never identified. Defect elimination procedures did not go beyong fire-fighting actions.
A4-1	Impact of Cupped&Crooked lumber on overall performance was unknown. Material input system was vauge	WHY
A4-2	Operations are small scale and all the revenue is transferred to support educational activities. The product design was developed to generate revenue and to contribute more to the society. Sustainability and other complimentary concepts have become part of the latest innovation wave.
A4-3	Process was never evaluated by a qualified professional who could conduct a quality improvement project that would actually succeed.
A5-1a	Non-optimal storage conditions caused occurrence of cupp&crook issues which in return increased processing times, occurrence of production defects, energy consumption and cost factors.	WHY
A5-1b	Material input system was not designed to the best interest of the product specificaitons. Therefore, excess processing time occurred.
A5-3	Very poor sustainability performance of the system is noticed only recently.
Issue	Gender Bias Ratio (Score=3.08) 4 Female 13 Male employees over the years of 2016-2018	WHY
A1-1	No HR policy to achieve balance	WHY
A2-1	No Mandatory regulations in this category	WHY
A2-2	Management did not pay attention to the disbalance.
A2-3	Male employees took part in the production more often over time
A3-1	Policy development takes time	WHY
A3-2	Production only occurs two days a week and only requries 2 employees
A3-3	Job assignment for this production line was made first-come-first-serve basis among those volunteered at the beginning of each week
A4-1	Male employees were more interested in this line than their female counterparts.	WHY
A4-2	More male employees applied for openings in this facility and balance was never established in the absence of an such HR policy.
Issue	Defect Rate (26.81%)	WHY
A1-1	Knife Marks, edge cracks and some other dimension Issues Occur in Process 2	WHY
A1-2	Loose Knots cause faulty products
A1-3	Too narrow or thin sticks produced in Process 2
A1-4	Faulty species arrangement in Process 4
A1-5	Faulty edging occurred on CNC
A1-6	Boards moved during engraving process
A1-7	Some surface stains observed right before product packaging
A2-1	Blade Hits a High Density Spot in the Wood or Feeding Speed is too fast. Knives may be dull.	WHY
A2-2	Low Quality Wood is Used. Loose Knots are more common in lower grades.
A2-3	Cupped & Crooked lumber ends up in faulty dimensions
A2-4	Lab Lighting may not be appropriate for wood surface inspection purposes, It Takes Time to Become an Expert on Wood ID, Production is often rushed.
A2-5	CNC router head moves at high velocity and pushes the boards upon contact.
A2-6	Either cutting boards or Alignment Board moves due to vibration and sudden movement of laser tip on 3 different axis.
A2-7	Improper material handling.
A3-1	Existence of sound knots, rushed production and insufficient maintenance frequency(may be?)	WHY
A3-2	Low quality lumber mix preferred since primary objective is to minimize cost. Improper storage conditions.
A3-3	Process flow require lumber to be processed on jointer and planer before cut into sticks which results in uneven thickness of sticks
A3-4	Wood Identification is not an easy task any potential variable including ambient light may have impact on the outcome
A3-5	Suction is lost during CNC processing
A3-6	Boards are fully secured onto the base table in Process 8
A3-7	Dirty gloves or work bench.
A4-1	Inherent to wood, desire to be done early, forgotten or ignored maintenance schedule.	WHY
A4-2	The product is not a primary profit generator for the facility. Storage area lacks required SOPs
A4-3	Workers would like to do it the way they are used to.
A4-4	Wood is one of the most complex materials on earth
A4-5	Current alignment guide have design issues
A4-6	Too much human error involved in this process
A4-7	Incautious worker or lack of 5S
A5-3	Change resistance	WHY
A5-5	No access to the actual suction source
A5-6	Current alignment board is not error-proof even though process requires high precision alignment
A5-7	Lack of Training and/or Ignorance of Sustain step of 5S
A5-Overall	Lack of Poka-Yoke throughout the facility
Issue	Rolling Throughput Yield (26.81%)	WHY
A1-1	Inappropriate length of material input for Process 3	WHY
A1-2	Overprocessing of Lumber in Process 1
A1-3	Inappropriate thickness of material input for Process 2
A1-4	Uncontrolled amounts of glue and mineral oil usage
A2-1	Shared storage for all product families. Workers are unaware of product requirements and internal customer specs	WHY
A2-2	Necessity to clear cup&crook defects
A2-3	Shared storage area for all product families. Workers are unaware of product requirements and internal customer specs
A2-4	Applied directly from container without any control measures.
A3-1	Space limitations. Lack of material picking SOPs	WHY
A3-2	Cup&crook occurs in lumber and requires special attention(overprocessing)
A3-3	Space limitations. Lack of material picking SOPs
A3-4	Incautious worker, lack of training, reckless production control
A4-1	Small-size organization. Non-optimal material input specs from procurement to material release to the production	WHY
A4-2	Lumbers left out of conditioning chamber
A4-3	Small-size organization. Non-optimal material input specs from procurement to material release to the production
A4-4	Cost is small compared to lumber and environmental impact was never considered before
A5-2	Lack of organization in storage area. Clustered, improper stacking, sorting and storing	WHY
A5-4	Sustainabilit has recently added to the agenda of the management.
	END OF THE DOCUMENT
