# Supplementary material
Source: MDPI journal article supplement (https://www.mdpi.com/2071-1050/11/8/2361)

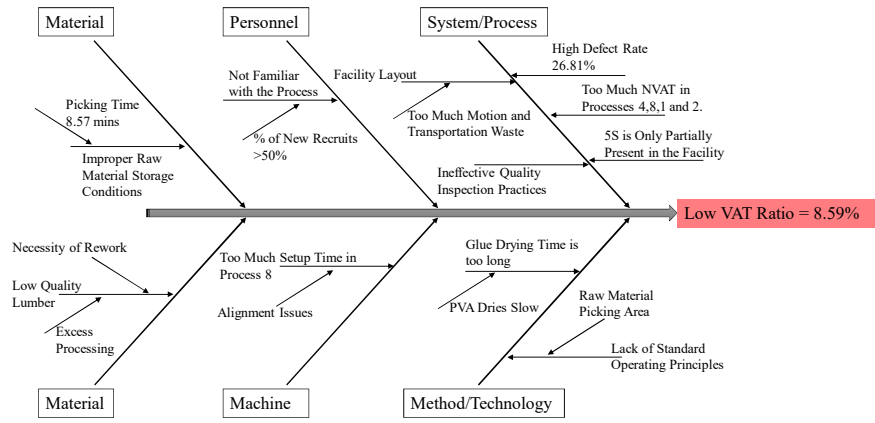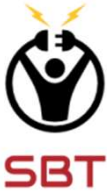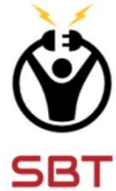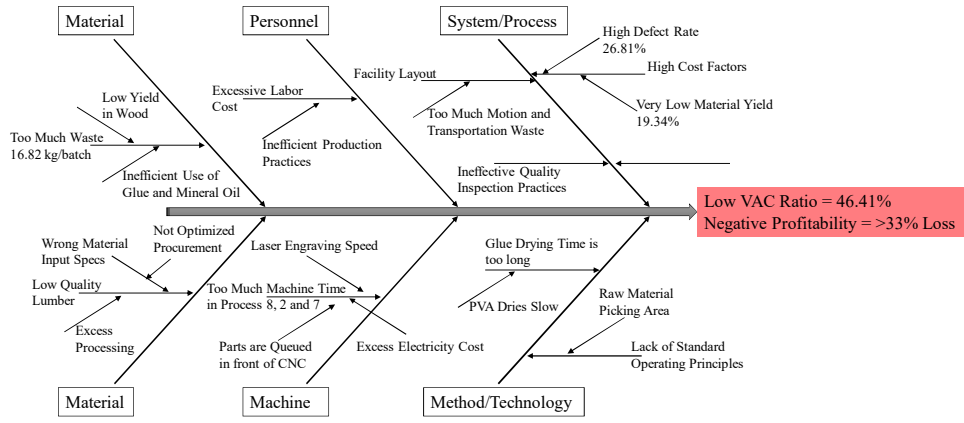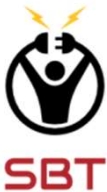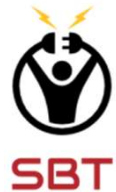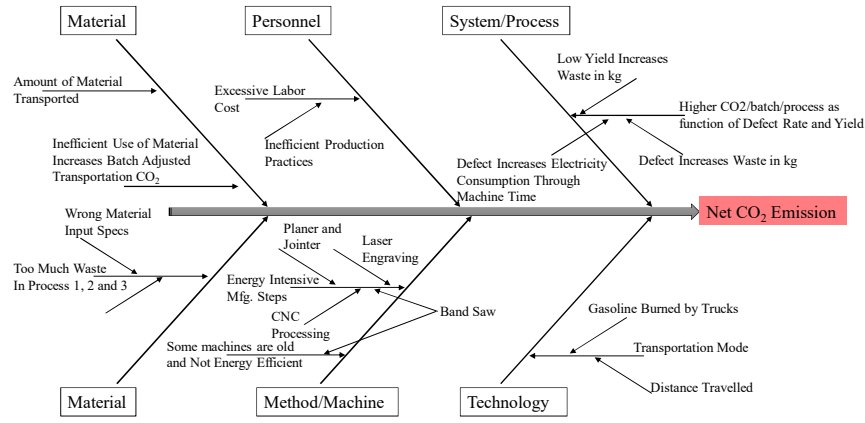

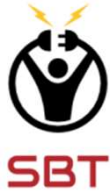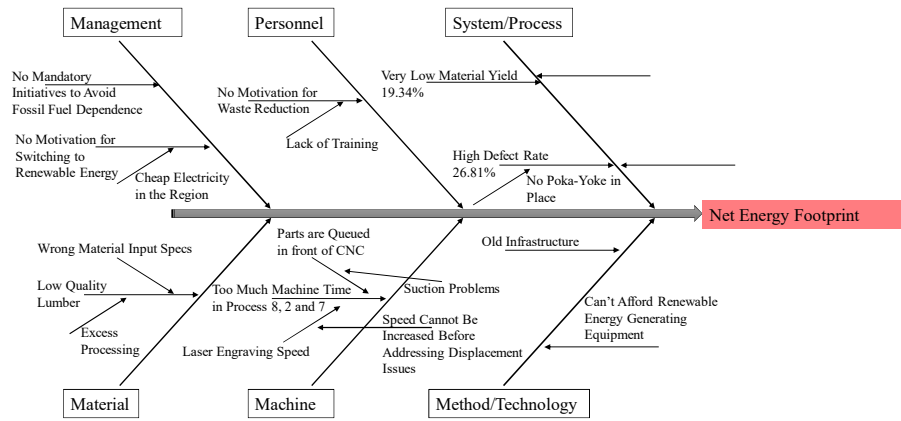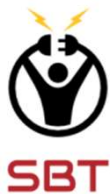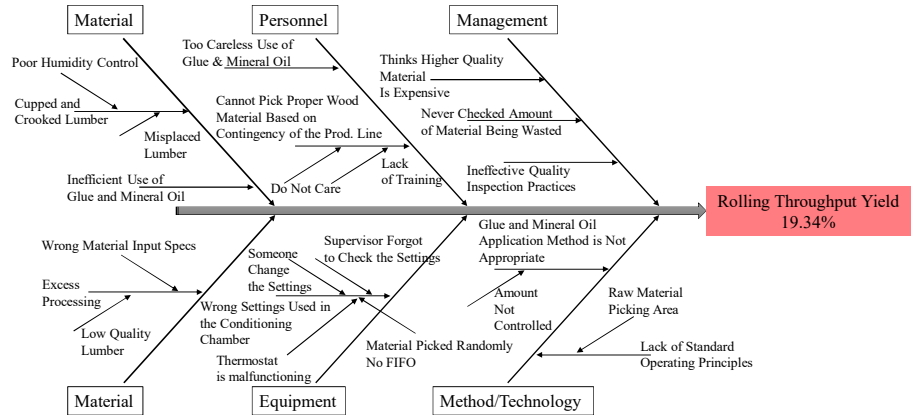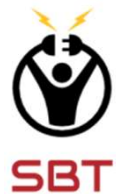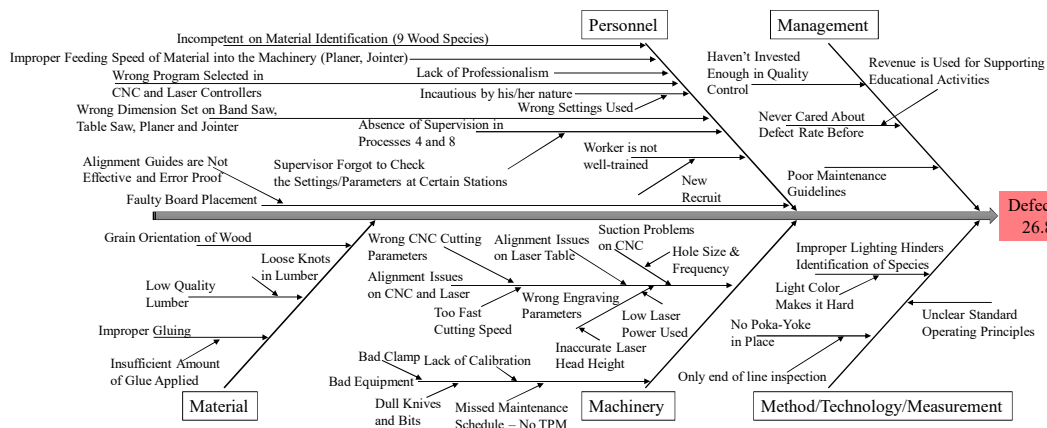

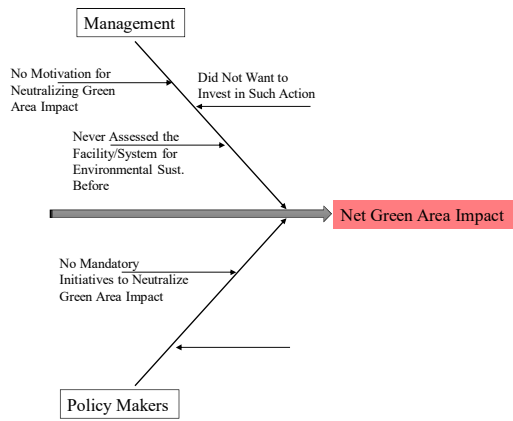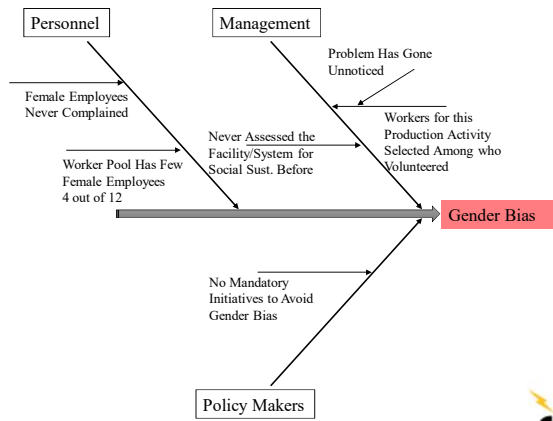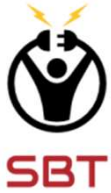

End of the Document

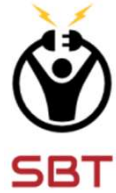

Supplement: s1 [file s1]
